# Supplementary material for: The role of faecal microbiota transplantation: looking beyond Clostridioides difficile infection
Source: PubMed Central journal article supplement (PMC7841662; doi:10.1177/2049936120981526), 2021-01-25
Supplement: sj-pdf-1-tai-10.1177_2049936120981526.pdf [file sj-pdf-1-tai-10.1177_2049936120981526.pdf]

Supplementary table 1: Completed, but not yet published, FMT trials (not including those for CDI)

| Condition                                       | Identifier  | Official title                                                                                                                                                             | Participants                       | Intervention                                                                                    | Primary outcome measure(s)                                                                                                                                        | Follow-up period |
|-------------------------------------------------|-------------|----------------------------------------------------------------------------------------------------------------------------------------------------------------------------|------------------------------------|-------------------------------------------------------------------------------------------------|-------------------------------------------------------------------------------------------------------------------------------------------------------------------|------------------|
| Inflammatory bowel disease (ulcerative colitis) | NCT02330653 | A Phase I/II, Double Blinded, Placebo Controlled, Single-centre Study of Faecal Microbiota Transplantation (FMT) for the Treatment of Active Paediatric Ulcerative Colitis | 60 (actual = 11)<br>5-30 years old | Retention enema followed by capsule FMT vs. placebo                                             | <ul style="list-style-type: none"> <li>Safety and tolerability of universal donor FMT compared to placebo: FMT-related adverse events grade 2 or above</li> </ul> | 1 year           |
|                                                 | NCT03378921 | Double-blinded Randomized Placebo Controlled Study: Faecal Microbiota Transplantation in the Treatment of Chronic Pouchitis                                                | 26<br>18-75 years old              | 2 doses of allogeneic vs autologous FMT via flexible sigmoidoscopy 4 weeks apart                | <ul style="list-style-type: none"> <li>Clinical remission</li> </ul>                                                                                              | 54 weeks         |
|                                                 | NCT02428361 | Faecal Microbiota Transplant (FMT) for Pouchitis                                                                                                                           | 19<br>18+ years old                | 250 mL of the faecal suspension in aliquots of 50-60 mL via endoscope                           | <ul style="list-style-type: none"> <li>Clinical improvement of pouchitis</li> </ul>                                                                               | 6 months         |
|                                                 | NCT04294615 | Clinical Response and Safety Following Faecal Microbiota Transplantation by Automatic Methods in Patients with Moderate-Severe Active Ulcerative Colitis                   | 9<br>18-75 years old               | Nasojejunal automatically prepared FMT vs. FMT via colonoscopy                                  | <ul style="list-style-type: none"> <li>Clinical response</li> </ul>                                                                                               | 2 weeks          |
|                                                 | NCT02049502 | The Use of Faecal Microbiota Transplantation in Patients with Ulcerative Colitis-associated Pouchitis                                                                      | 8<br>18-65 years old               | FMT via flexible sigmoidoscopy                                                                  | <ul style="list-style-type: none"> <li>Number of Patients Who Experienced Improvement of Pouchitis Symptoms</li> </ul>                                            | 3 months         |
|                                                 | NCT03711006 | The Effect of Faecal Microbiota Transplantation in Ulcerative Colitis - A Case Study                                                                                       | 7<br>18-50 years old               | 25 multi-donor FMT capsules daily for 50 days                                                   | <ul style="list-style-type: none"> <li>Change in patient colitis symptoms as assessed using the Simple Colitis Clinical Activity Index (SCCAI)</li> </ul>         | 24 weeks         |
|                                                 | NCT01947101 | A Phase I Study of Faecal Microbiota Transplantation (FMT) in Immunomodulator Dependent Paediatric Ulcerative Colitis (UC)                                                 | 6<br>12-20 years old               | FMT endoscopically administered directly into the colon. Consecutive treatments by rectal enema | <ul style="list-style-type: none"> <li>Assess safety of FMT treatment by recording the frequency of adverse events.</li> </ul>                                    | 1 year           |
|                                                 | NCT02227342 | A Prospective, Single Centre, Open-Label Trial of Faecal Microbiota Transplantation (FMT) in the Management of Active Ulcerative Colitis                                   | 3<br>18-65 years old               | Serial FMT                                                                                      | <ul style="list-style-type: none"> <li>Mayo score reduction</li> </ul>                                                                                            | 32 weeks         |
| Inflammatory bowel disease (Crohn's disease)    | NCT03194529 | Safety of FMT in Maintenance of Paediatric Crohn's Disease                                                                                                                 | 9<br>7-21 years old                | Equivalent of 50g FMT via nasojejunal route                                                     | <ul style="list-style-type: none"> <li>Incidence of Treatment-Emergent Adverse Events</li> </ul>                                                                  | 24 weeks         |

|                                                  |             |                                                                                                                                                                                                 |                       |                                                                |                                                                                                                                                                                                                                                                                                                      |          |
|--------------------------------------------------|-------------|-------------------------------------------------------------------------------------------------------------------------------------------------------------------------------------------------|-----------------------|----------------------------------------------------------------|----------------------------------------------------------------------------------------------------------------------------------------------------------------------------------------------------------------------------------------------------------------------------------------------------------------------|----------|
|                                                  | NCT02199561 | A Prospective, Single Centre, Open Label Trial of Faecal Microbiota Transplantation (FMT) in the Management of Active Crohn's Disease                                                           | 3<br>18-65 years old  | FMT by colonoscopy at 0, 4 & 8 weeks, and enema at 2 & 6 weeks | <ul style="list-style-type: none"> <li>Harvey-Bradshaw index (HBI) score reduction</li> </ul>                                                                                                                                                                                                                        | 32 weeks |
| Inflammatory bowel disease (microscopic colitis) | NCT03275467 | Faecal Microbiota Transplantation in Patients with Microscopic Colitis                                                                                                                          | 10<br>18-65 years old | FMT via colonoscopy then enema for 2 further doses             | <ul style="list-style-type: none"> <li>Proportion of MC patients in remission six weeks after the first FMT</li> </ul>                                                                                                                                                                                               | 6 months |
| Inflammatory bowel disease                       | NCT02487238 | A Single-Blind, Randomized, Placebo-Controlled Trial of Human Faecal Microbiota Transplantation for the Therapy of Paediatric Ulcerative Colitis and Inflammatory Bowel Disease<br>Unclassified | 35<br>3-17 years old  | FMT vs. placebo via enema twice weekly for 6 weeks             | <ul style="list-style-type: none"> <li>Feasibility (Composite Measure)</li> </ul>                                                                                                                                                                                                                                    | 30 weeks |
| Irritable bowel syndrome                         | NCT02847481 | A Pilot Study to Evaluate Faecal Microbiota Transplantation Engraftment in Irritable Bowel Syndrome                                                                                             | 80<br>18+ years old   | FMT with antibiotic pre-treatment vs. placebo                  | <ul style="list-style-type: none"> <li>Stable engraftment of donor microbiota</li> </ul>                                                                                                                                                                                                                             | 10 weeks |
| Constipation                                     | NCT03308461 | Faecal Microbiota Transplantation for Constipation with Difficult Defecation                                                                                                                    | 22<br>14-80 years old | Single dose FMT via endoscope                                  | <ul style="list-style-type: none"> <li>Defecation frequency</li> </ul>                                                                                                                                                                                                                                               | 12 weeks |
| Diarrhoea                                        | NCT04040712 | Faecal Microbiota Transplantation to Treat Diarrhoea Induced by Tyrosine-kinase Inhibitors in Patients with Metastatic Renal Cell Carcinoma: a Randomized Clinical Trial                        | 20<br>18+ years old   | FMT vs placebo                                                 | <ul style="list-style-type: none"> <li>Rate of patients who experience resolution of diarrhoea 4 weeks after the end of treatments</li> </ul>                                                                                                                                                                        | 8 weeks  |
| Antibiotic resistant organisms                   | NCT03063437 | Phase II Randomized, Double Blind, Placebo-controlled, Parallel Group Trial of Encapsulated Faecal Microbiota Transplantation for Vancomycin Resistant Enterococcus Decolonization              | 9<br>18+ years old    | 30 capsules of FMT vs. placebo                                 | <ul style="list-style-type: none"> <li>Percentage of Participants with VRE Decolonization</li> <li>Percentage of Participants with an Adverse Event (AE); Severe Adverse Event (SAE); and Newly Acquired Transmissible Infectious Diseases Which Are Considered Adverse Events of Special Interest (AESI)</li> </ul> | 6 months |
|                                                  | NCT03061097 | Randomized Controlled Trial of Autologous Microbiome Reconstitution to Prevent Colonization by Antibiotic Resistant Bacteria                                                                    | 4<br>18+ years old    | Autologous FMT vs. normal saline via enema                     | <ul style="list-style-type: none"> <li>Safety (short-term) defined as absence of NIH Grade <math>\geq 2</math> adverse events including IND safety reporting criteria</li> </ul>                                                                                                                                     | 6 months |
| Metabolic syndrome                               | NCT03727321 | Faecal Microbial Transplantation and Fibre Supplementation in Subjects with Obesity and Metabolic Syndrome                                                                                      | 68<br>18-65 years old | 50g FMT in capsules vs. placebo                                | <ul style="list-style-type: none"> <li>Insulin Sensitivity Assessment</li> </ul>                                                                                                                                                                                                                                     | 12 weeks |

|                          |             |                                                                                                                                                                |                                  |                                                                       |                                                                                                                                                                                                                                                      |          |
|--------------------------|-------------|----------------------------------------------------------------------------------------------------------------------------------------------------------------|----------------------------------|-----------------------------------------------------------------------|------------------------------------------------------------------------------------------------------------------------------------------------------------------------------------------------------------------------------------------------------|----------|
|                          | NCT02496390 | Transplantation of Microbes of Faecal Origin for Prevention and Treatment of Metabolic Syndrome and Non-Alcoholic Fatty Liver Disease                          | 21<br>18+ years old              | Allogeneic vs. autologous FMT                                         | <ul style="list-style-type: none"> <li>Improvement in Homeostasis model assessment (HOMA) score</li> </ul>                                                                                                                                           | 6 months |
|                          | NCT02730962 | Interventional Bioremediation of Microbiota in Metabolic Syndrome                                                                                              | 12<br>18-70 years old            | Antibiotic pre-treatment or placebo followed by FMT via colonoscopy   | <ul style="list-style-type: none"> <li>Insulin sensitivity measured by standard euglycemic insulin clamp. Post-FMT insulin sensitivity measurements between subjects that receive antibiotic versus placebo conditioning will be compared</li> </ul> | 10 weeks |
| HIV                      | NCT03008941 | A Phase I/II Randomized, Double-Blind, Placebo Controlled Study of Repeated Low-Dose Faecal Microbiota Restoration in HIV-Infected Subjects. The REFRESH Study | 30<br>18-80 years old            | 10 capsules FMT followed by 5 capsules weekly for 7 weeks vs. placebo | <ul style="list-style-type: none"> <li>Number of participants with treatment-related adverse events as assessed by CTCAE v4.0</li> </ul>                                                                                                             | 48 weeks |
|                          | NCT04165200 | Faecal Microbiota Transplantation as a Therapeutic Strategy for Patients Infected With HIV                                                                     | 22<br>18+ years old              | 60 FMT vs. placebo capsules at 5 time points over 12 weeks            | <ul style="list-style-type: none"> <li>Levels of CD4 cells</li> </ul>                                                                                                                                                                                | 6 months |
|                          | NCT03329560 | Safety of Faecal Microbiota Transplant using Oral Encapsulated PRIM-DJ2727 in HIV-infected Persons on Antiretroviral Therapy                                   | 6<br>18+ years old               | Oral capsules containing lyophilized microbiota weekly for 6 weeks    | <ul style="list-style-type: none"> <li>Number of participants with adverse events related to study drug</li> <li>Cumulative of adverse events related to study drug</li> <li>Severity of adverse events related to study drug</li> </ul>             | 1 year   |
| Chronic kidney disease   | NCT04361097 | Faecal Microbiota Transplantation as a Therapeutic Strategy in the Progression of Chronic Kidney Disease                                                       | 28<br>18+ years old              | 60 capsules FMT over 48hrs on days 0, 10 and 30 vs. placebo           | <ul style="list-style-type: none"> <li>Creatinine Clearance</li> </ul>                                                                                                                                                                               | 6 months |
| Parkinson's disease      |             | Faecal Microbiota Transplantation as a Potential Treatment for Parkinson's Disease: A Pilot Study                                                              | 15 (actual= 10)<br>50+ years old | Single dose FMT                                                       | <ul style="list-style-type: none"> <li>Motor parkinsonian symptoms</li> <li>Constipation level</li> </ul>                                                                                                                                            | 6 months |
| Urinary tract infections | NCT03050515 | Faecal Microbiota Transplantation for the Treatment of Recurrent Urinary Tract                                                                                 | 12<br>18-100 years old           | FMT via retention enema                                               | <ul style="list-style-type: none"> <li>Change in frequency of culture proven urinary tract infections following faecal transplant</li> </ul>                                                                                                         | 6 months |
| Sjögren's syndrome       | NCT03926286 | Faecal Microbial Transplantation for Sjögren's Syndrome                                                                                                        | 10<br>18+ years                  | 2 doses of FMT enema 1 week apart                                     | <ul style="list-style-type: none"> <li>Number of participants with reported adverse events (AEs) and serious adverse events (SAEs)</li> <li>Number of participants with stable microbiome engraftment</li> </ul>                                     | 7 months |
| Hepatitis B infection    | NCT02689245 | Randomized Controlled Trial Comparing the Efficacy and Safety of FMT in                                                                                        | 64<br>18-80 years old            | FMT via nasojejunal tube vs. control                                  | <ul style="list-style-type: none"> <li>Transplant free survival</li> </ul>                                                                                                                                                                           | 3 months |

|                        |             |                                                                                                                                                                                     |                      |                                                         |                                                                                               |          |
|------------------------|-------------|-------------------------------------------------------------------------------------------------------------------------------------------------------------------------------------|----------------------|---------------------------------------------------------|-----------------------------------------------------------------------------------------------|----------|
|                        |             | Hepatitis B Reactivation Leads to Acute on Chronic Liver Failure                                                                                                                    |                      |                                                         |                                                                                               |          |
| Hepatic encephalopathy | NCT02255617 | A Prospective, Single Centre, Open-Label Trial of Faecal Microbiota Transplantation (FMT) in the Management of Hepatic Encephalopathy (HE): a Pilot Study                           | 4<br>18-65 years old | FMT via colonoscopy at week 0 and by enema at weeks 1-4 | <ul style="list-style-type: none"> <li>Time to hepatic encephalopathy breakthrough</li> </ul> | 6 months |
| Mesothelioma           | NCT04056026 | A Single Dose FMT Infusion from a Healthy Family Donor Via Colonoscopy as an Adjunct to Keytruda for the Benefit of Improving Efficacy of Immunotherapy for Metastatic Mesothelioma | 1                    | FMT via colonoscopy                                     | <ul style="list-style-type: none"> <li>Progression free survival</li> </ul>                   | 5 years  |

Supplementary table 2: Ongoing FMT trials (not including those for CDI)

| Condition                                       | Identifier  | Official title                                                                                                                                                                                            | Participants           | Intervention                                                                     | Primary outcome measure(s)                                                                                                                                                                                                                         | Follow-up period |
|-------------------------------------------------|-------------|-----------------------------------------------------------------------------------------------------------------------------------------------------------------------------------------------------------|------------------------|----------------------------------------------------------------------------------|----------------------------------------------------------------------------------------------------------------------------------------------------------------------------------------------------------------------------------------------------|------------------|
| Inflammatory bowel disease (ulcerative colitis) | NCT01790061 | Efficacy, Durability and Safety of Standardized Faecal Microbiota Transplantation in Patients with Moderate to Severe Ulcerative Colitis                                                                  | 500<br>6-80 years old  | FMT via endoscopy                                                                | <ul style="list-style-type: none"> <li>Efficacy of FMT</li> </ul>                                                                                                                                                                                  | 10 years         |
|                                                 | NCT03483246 | Impact of Faecal Microbiota Transplant in Ulcerative Colitis: a Randomized, Sham Controlled Trial                                                                                                         | 150<br>18-75 years old | FMT vs. placebo via colonoscopy                                                  | <ul style="list-style-type: none"> <li>Steroid-free clinical and endoscopic remission</li> </ul>                                                                                                                                                   | 24 weeks         |
|                                                 | NCT03998488 | A Randomized, Placebo-controlled Clinical Trial Examining the Efficacy of Faecal Microbiota Transplantation (FMT) and Subsequent Dietary Fibre in Patients with Moderate Ulcerative Colitis               | 135<br>18-89 years old | 250ml FMT vs. placebo via colonoscopy followed by alternate at 8 weeks +/- fibre | <ul style="list-style-type: none"> <li>Clinical Response</li> </ul>                                                                                                                                                                                | 8 weeks          |
|                                                 | NCT03078803 | A Prospective Multicentre Randomized Controlled Trial Comparing Faecal Microbiota Transplantation (FMT) to Placebo in the Treatment of Mild to Moderate Crohn's Disease                                   | 126<br>18+ years old   | FMT via colonoscopy then oral capsules vs. placebo                               | <ul style="list-style-type: none"> <li>Clinical and Endoscopic Remission</li> </ul>                                                                                                                                                                | 8 weeks          |
|                                                 | NCT03804931 | Efficacy and Safety of Faecal Microbiota Transplant for Ulcerative Colitis                                                                                                                                | 120<br>18-65 years old | FMT vs. placebo via colonoscopy                                                  | <ul style="list-style-type: none"> <li>Clinical remission in patient as assessed using Mayo score</li> <li>Clinical improvement in patient as assessed using Mayo score</li> </ul>                                                                 | 12 weeks         |
|                                                 | NCT03273465 | Faecal Microbiota Transplantation in Newly Diagnosed Patients with Ulcerative Colitis - a Double Blind, Placebo-Controlled Trial                                                                          | 100<br>18-50 years old | FMT vs. placebo via capsules                                                     | <ul style="list-style-type: none"> <li>UC remission</li> </ul>                                                                                                                                                                                     | 12 months        |
|                                                 | NCT03582969 | High Intensity, Multi-Donor, Oral Capsulized Faecal Microbiota Transplantation in Newly Diagnosed Paediatric Patients with Mild to Moderate Ulcerative Colitis - a Double Blind, Placebo-Controlled Trial | 100<br>12-18 years old | FMT vs. placebo capsules                                                         | <ul style="list-style-type: none"> <li>UC remission</li> </ul>                                                                                                                                                                                     | 1 year           |
|                                                 | NCT02606032 | Randomized Trial of Antimicrobials Versus Placebo in Addition to Faecal Microbiota Therapy in for the Induction of Remission in Active Ulcerative Colitis                                                 | 80<br>18+ years old    | Antibiotics or placebo followed by FMT twice weekly for 8 weeks                  | <ul style="list-style-type: none"> <li>The primary outcome of the randomized trial is remission of UC defined as a Mayo score &lt; 3 with an endoscopic Mayo score = 0 at the end of the trial Transplant Therapy in Ulcerative Colitis</li> </ul> | 9 weeks          |

|                                              |             |                                                                                                                                                                                       |                       |                                                                                                                                            |                                                                                                                                                                                                                                                                                                                                                                                                                                                                                                  |           |
|----------------------------------------------|-------------|---------------------------------------------------------------------------------------------------------------------------------------------------------------------------------------|-----------------------|--------------------------------------------------------------------------------------------------------------------------------------------|--------------------------------------------------------------------------------------------------------------------------------------------------------------------------------------------------------------------------------------------------------------------------------------------------------------------------------------------------------------------------------------------------------------------------------------------------------------------------------------------------|-----------|
|                                              | NCT04100291 | The Effect of Faecal Microbiota Transplantation in the Treatment of Chronic Pouchitis: A Multicentre, Placebo-controlled, Randomized, Double Blinded Trial                            | 50<br>18+ years old   | FMT vs. placebo via enema daily for 4 weeks                                                                                                | <ul style="list-style-type: none"> <li>Number of patients achieving clinical remission assessed by PDAI</li> </ul>                                                                                                                                                                                                                                                                                                                                                                               | 12 months |
|                                              | NCT03561532 | Faecal Microbiota Transplantation in the treatment of ulcerative colitis                                                                                                              | 48<br>18-75 years old | FMT vs. placebo via colonoscopy                                                                                                            | <ul style="list-style-type: none"> <li>Maintenance of remission of ulcerative colitis</li> </ul>                                                                                                                                                                                                                                                                                                                                                                                                 | 1 year    |
|                                              | NCT03524352 | Prospective Multi-centre Randomized Controlled Double-blind Label Study of the Prophylaxis of Recurrent Pouchitis After Faecal Microbiota Transplant in UC With Ileo-anal Anastomosis | 42<br>18+ years old   | FMT vs. placebo                                                                                                                            | <ul style="list-style-type: none"> <li>Number of days between the date of transplantation and the date of relapse according to physiological and endoscopic parameter (pouchitis disease activity index)</li> </ul>                                                                                                                                                                                                                                                                              | 2 years   |
|                                              | NCT03006809 | Optimal Faecal Microbiota Transplant Dosing for Mild to Moderate Ulcerative Colitis                                                                                                   | 40<br>18-64 years old | 4 arms involving pre-treatment with antibiotics vs. none followed by FMT via colonoscopy followed by FMT maintenance via enema or capsules | <ul style="list-style-type: none"> <li>The occurrence of a Serious Adverse event (SAE), solicited and unsolicited AE, new gastrointestinal medical condition and diagnoses from FMT treatment or new infection from FMT treatment</li> <li>Steroid-free Clinical Remission at week 9 + endoscopic remission or response defined as total Mayo score <math>\leq 2</math> with all four sub-scores <math>\leq 1</math> and a <math>\geq 1</math>-point reduction in endoscopy sub-score</li> </ul> | 1 year    |
|                                              | NCT03545386 | Randomized Trial of Faecal Microbiota Transplantation Versus Placebo for the Induction of Remission in Patients with Active Pouchitis                                                 | 34<br>18-99 years old | FMT vs. placebo via enema                                                                                                                  | <ul style="list-style-type: none"> <li>Remission of pouchitis, defined as a pouchitis disease activity index (PDAI) score of <math>&lt; 7</math>, with a decreased from baseline PDAI score of 3 points</li> </ul>                                                                                                                                                                                                                                                                               | 7 weeks   |
|                                              | NCT03948919 | Low Sulphur Faecal Transplant for Ulcerative Colitis                                                                                                                                  | 20<br>18-89 years old | FMT vs. placebo via capsule daily for 8 weeks                                                                                              | <ul style="list-style-type: none"> <li>Engraftment of low sulphate reducing microbiota</li> </ul>                                                                                                                                                                                                                                                                                                                                                                                                | 12 weeks  |
|                                              | NCT03716388 | Faecal Microbiota Therapy Vs 5-aminosalicylates for Induction of Remission in Newly Diagnosed Mild-moderately Active UC: a Pilot Study                                                | 20<br>18-75 years old | FMT vs. placebo +/- mesalamine via colonoscopy at weeks 0, 2, 6, 10, 14                                                                    | <ul style="list-style-type: none"> <li>Clinical remission</li> </ul>                                                                                                                                                                                                                                                                                                                                                                                                                             | 14 weeks  |
| Inflammatory bowel disease (Crohn's disease) | NCT01793831 | Efficacy and Safety of Standardized Faecal Microbiota Transplantation for Moderate to Severe Crohn's Disease                                                                          | 200<br>6-80 years old | Not specified                                                                                                                              | <ul style="list-style-type: none"> <li>Clinical remission</li> </ul>                                                                                                                                                                                                                                                                                                                                                                                                                             | 10 years  |

|                                |             |                                                                                                                                                                                                          |                        |                                                                                                     |                                                                                                                                                                                             |          |
|--------------------------------|-------------|----------------------------------------------------------------------------------------------------------------------------------------------------------------------------------------------------------|------------------------|-----------------------------------------------------------------------------------------------------|---------------------------------------------------------------------------------------------------------------------------------------------------------------------------------------------|----------|
|                                | NCT03378167 | PediCRaFT: Paediatric Crohn's Disease Faecal Microbiota Transplant Pilot Study                                                                                                                           | 45<br>3-17 years old   | FMT vs. placebo via colonoscopy followed by FMT vs. placebo capsules for 6 weeks                    | <ul style="list-style-type: none"> <li>Monthly Recruitment Rate</li> <li>Dropout Rate Post Enrolment</li> <li>Rate of Patient Protocol Adherence</li> <li>Rate of Adverse Events</li> </ul> | 30 weeks |
|                                | NCT02417974 | Prevention of Recurrence of Crohn's Disease by Faecal Microbiota Therapy (FMT)                                                                                                                           | 44<br>18+ years old    | FMT vs. placebo via colonoscopy                                                                     | <ul style="list-style-type: none"> <li>Post-operative endoscopic recurrence</li> </ul>                                                                                                      | 6 months |
|                                | NCT02897661 | Washed Microbiota Transplant Combining Exclusive Enteral Nutrition Contribute to Nutritional Improvement of Patients with Crohn's Disease                                                                | 30<br>18-65 years old  | Early vs. delayed washed FMT                                                                        | <ul style="list-style-type: none"> <li>changes in haemoglobin</li> <li>changes in albumin and prealbumin in g/L</li> <li>changes in lymphocyte count in 10<sup>9</sup>/L</li> </ul>         | 15 days  |
|                                | NCT03267238 | Faecal Microbial Transplantation in Patients with Crohn's Disease                                                                                                                                        | 9<br>7+ years old      | Not specified                                                                                       | <ul style="list-style-type: none"> <li>Number of participants with treatment-related adverse events as assessed by CTCAE v4.0.</li> </ul>                                                   | 6 years  |
| Inflammatory bowel disease     | NCT04436874 | Faecal Microbiota Transplantation in the Treatment of Inflammatory Bowel Disease: the Role of Selection of the Dai Ethnic Group as Donor Source in Terms of Treatment Efficacy and Pathogenic Mechanisms | 240<br>18-75 years old | FMT via endoscopy                                                                                   | <ul style="list-style-type: none"> <li>Steroid-free clinical remission and endoscopic remission</li> </ul>                                                                                  | 3 years  |
|                                | NCT03399188 | Faecal Microbiota Transplantation and Analysis of Faecal Microbiome in IBD Patients                                                                                                                      | 100<br>7-80 years old  | FMT via colonoscopy                                                                                 | <ul style="list-style-type: none"> <li>Clinical remission</li> </ul>                                                                                                                        | 6 months |
|                                | NCT04011943 | Study of the Effects of Faecal Microbiota Transplantation for Correction of the Physiological State of the Human Body in Norm and in Pathology                                                           | 50<br>18-75 years old  | Allogeneic vs. autologous FMT vs. placebo                                                           | <ul style="list-style-type: none"> <li>Ulcerative Colitis remission</li> <li>Crohn Disease remission</li> </ul>                                                                             | 1 month  |
|                                | NCT02734589 | Faecal Transplantation Using a Novel Conditioning Method for Donor and Recipient in Mild to Moderate Treatment Refractory Colitis in Inflammatory Bowel Disease                                          | 34<br>18-70 years old  | FMT via endoscopy or colonoscopy from donor who has vs. has not undertaken special diet vs. control | <ul style="list-style-type: none"> <li>Clinical remission</li> </ul>                                                                                                                        | 12 weeks |
| Antibiotic resistant organisms | NCT04188743 | DEKODON: Decolonization of Gram-negative Multi-resistant Organisms (MDRO) With Donor Microbiota (FMT)                                                                                                    | 150<br>18+ years old   | Allogeneic vs. autologous FMT via endoscopy vs. control                                             | <ul style="list-style-type: none"> <li>Number of participants with decolonization success/failure</li> </ul>                                                                                | 1 year   |
|                                | NCT04181112 | Faecal Microbiota Transplantation (FMT) for Intestinal Decolonization of Multidrug-resistant Opportunistic Pathogens                                                                                     | 90<br>18+ years old    | FMT via enema +/- antibiotic pre-treatment                                                          | <ul style="list-style-type: none"> <li>The elimination of the target multi-drug resistant organism (MDRO), using culture and</li> </ul>                                                     | 3 years  |

|                    |             |                                                                                                                                                                                                                                            |                       |                                             |                                                                                                                                                                                                                                                                                                      |           |
|--------------------|-------------|--------------------------------------------------------------------------------------------------------------------------------------------------------------------------------------------------------------------------------------------|-----------------------|---------------------------------------------|------------------------------------------------------------------------------------------------------------------------------------------------------------------------------------------------------------------------------------------------------------------------------------------------------|-----------|
|                    |             |                                                                                                                                                                                                                                            |                       |                                             | molecular test-based screening of recipient stool, at both the 14 and 30 days post-FMT.                                                                                                                                                                                                              |           |
|                    | NCT03367910 | Faecal Microbiota Transplantation Using RBX2660 for the Prevention of Recurrent Urinary Tract Infections Due to Multidrug Resistant Organisms                                                                                              | 60<br>18+ years old   | FMT via enema                               | <ul style="list-style-type: none"> <li>FMT safety: adverse events during and after FMT</li> </ul>                                                                                                                                                                                                    | 6 months  |
|                    | NCT03029078 | Faecal Microbiota, a Hope to Eradicate Colonization of Patient Harboring eXtreme Drug Resistant Bacteria?                                                                                                                                  | 50<br>18+ years old   | FMT via nasoduodenal tube                   | <ul style="list-style-type: none"> <li>Negativation of digestive tract colonization</li> </ul>                                                                                                                                                                                                       | 6 months  |
|                    | NCT03802461 | Effectiveness of Faecal Flora Alteration for Eradication of Carbapenemase-producing Enterobacteriaceae Colonization Trial (EFFECT-CPE): a Multisite, Open-label, Randomized Controlled Feasibility Pilot Trial                             | 40<br>18+ years old   | 3 doses of 50g FMT vs. control              | <ul style="list-style-type: none"> <li>Incidence of intestinal colonization of patients with CPE 3 months after intervention.</li> <li>Randomization rate in study</li> <li>Proportion of patients retained in study for up to 6 months</li> </ul>                                                   | 12 months |
|                    | NCT03479710 | Faecal Microbiota Transplantation for Eradication of Intestinal Colonization of Carbapenem-resistant Enterobacteriaceae and Vancomycin-resistant Enterococcus: a Pilot Study                                                               | 40<br>18+ years old   | FMT via endoscopy vs. control               | <ul style="list-style-type: none"> <li>Intestinal colonization of CRE/VRE</li> </ul>                                                                                                                                                                                                                 | 12 months |
|                    | NCT02922816 | A Pilot Study Using Faecal Microbiota Transplant in Renal transplant Recipients to Eliminate Multidrug-Resistant Organism Colonization After Infection and Compare Gastrointestinal Carriage in a Randomized, Controlled, Crossover Design | 20<br>18+ years old   | FMT via rectal enema for 2 doses            | <ul style="list-style-type: none"> <li>The safety and feasibility of using FMT in adult participants with Target MDRO colonization after infection will be measured by comparing the number of adverse events (assessed by CTCAE v4.0) after Day 1 of each cycle as compared to baseline.</li> </ul> | 30 weeks  |
|                    | NCT02312986 | Use of Faecal Microbiota Transplantation (FMT) to Reverse Multi-Drug Resistant Organism Carriage                                                                                                                                           | 20<br>18+ years old   | FMT via enema                               | <ul style="list-style-type: none"> <li>Safety of FMT in patients with recurrent MDRO infections</li> </ul>                                                                                                                                                                                           | 1 year    |
|                    | NCT02543866 | Faecal Microbiota Transplantation as a Strategy to Eradicate Intestinal Carriage of Resistant Organisms                                                                                                                                    | 20<br>7-21 years old  | FMT via nasogastric tube                    | <ul style="list-style-type: none"> <li>Safety and Tolerability of FMT as measured by Incidence, severity, and relatedness of solicited, unsolicited, and serious adverse events</li> </ul>                                                                                                           | 5 years   |
| Metabolic syndrome | NCT03127696 | A Randomised Placebo-controlled Study of Faecal Microbiota Transplant (FMT) to Impact Body Weight and Glycaemic Control in Obese Subjects with Type 2 Diabetes Mellitus                                                                    | 61<br>18-70 years old | FMT vs. placebo +/- lifestyle modifications | <ul style="list-style-type: none"> <li>Proportion of subjects with at least 20% lean-associated microbiota in recipients after FMT compared with subjects receiving lifestyle intervention alone up to week 24</li> </ul>                                                                            | 24 weeks  |
|                    | NCT03273855 | Randomized Controlled Trial of Faecal Microbiota Transplantation in Severe Obesity                                                                                                                                                         | 60<br>18-69 years old | Allogeneic vs. autologous FMT via enema     | <ul style="list-style-type: none"> <li>Change in individual weight loss (kg)</li> </ul>                                                                                                                                                                                                              | 12 months |
|                    | NCT02970877 | Faecal Microbiota Transplant from Healthy Lean Donors to Morbidly Obese Individuals:                                                                                                                                                       | 48<br>18+ years old   | Allogeneic vs autologous FMT                | <ul style="list-style-type: none"> <li>Change in Insulin Resistance compared to baseline</li> </ul>                                                                                                                                                                                                  | 3 months  |

|                           |             |                                                                                                                                                                                                              |                       |                                                              |                                                                                                                                                                                                                                             |           |
|---------------------------|-------------|--------------------------------------------------------------------------------------------------------------------------------------------------------------------------------------------------------------|-----------------------|--------------------------------------------------------------|---------------------------------------------------------------------------------------------------------------------------------------------------------------------------------------------------------------------------------------------|-----------|
|                           |             | Effect on Insulin Resistance and Other Obesity-related Parameters. A Randomized Controlled Trial.                                                                                                            |                       |                                                              |                                                                                                                                                                                                                                             |           |
|                           | NCT03391817 | Faecal Microbiota Transplantation in the treatment of morbid obesity                                                                                                                                         | 40<br>18-65 years old | Allogeneic vs. autologous FMT via endoscopy                  | <ul style="list-style-type: none"> <li>Reduction of weight</li> </ul>                                                                                                                                                                       | 18 months |
|                           | NCT03789461 | An Open-label Pilot Study of Faecal Microbiota Transplant (FMT) to Induce Weight Loss in Obese Subjects                                                                                                      | 20<br>18-75 years old | Not specified                                                | <ul style="list-style-type: none"> <li>Proportion of at least 10% reduction in weight</li> </ul>                                                                                                                                            | 2 years   |
|                           | NCT04465032 | The Effect of Consecutive Faecal Microbiota Transplantation on Non-Alcoholic Fatty Liver Disease (NAFLD) - a Randomized-controlled Trial                                                                     | 20<br>18-70 years old | Allogeneic vs. autologous FMT via endoscopy at 0, 3, 6 weeks | <ul style="list-style-type: none"> <li>the effect on consecutive FMT on liver fat accumulation</li> </ul>                                                                                                                                   | 14 weeks  |
| Type 1 diabetes           | NCT04124211 | Faecal Microbiome Transplant (FMT) for Type 1 Diabetes                                                                                                                                                       | 10<br>18-65 years old | FMT via endoscopy                                            | <ul style="list-style-type: none"> <li>Changes in mean amplitude of glycaemic excursion (MAGE)</li> <li>Changes in standard deviation of blood glucose (SDBG)</li> <li>Changes in haemoglobin A1c (HbA1c)</li> <li>Safety of FMT</li> </ul> | 24 weeks  |
| Graft versus host disease | NCT03148743 | Faecal Microbiota Transplantation in Gut aGVHD Treated                                                                                                                                                       | 50<br>10-60 years old | Not specified                                                | <ul style="list-style-type: none"> <li>Times of stool</li> </ul>                                                                                                                                                                            | 1 week    |
|                           | NCT03359980 | Treatment of Steroid Refractory Gastro-intestinal Acute Graft-versus-Host disease after Allogeneic Hematopoietic Stem cell Transplantation with faecal Microbiota transfer                                   | 32<br>18+ years old   | MaaT013 via enema                                            | <ul style="list-style-type: none"> <li>Efficacy of FMT in the treatment of Steroid Refractory -Gastro-intestinal Acute GVHD (SR-GI-aGVHD) at D28 post inclusion</li> </ul>                                                                  | 6 months  |
|                           | NCT03812705 | Faecal Microbiota Transplantation for the Treatment of Steroid Resistant/Dependent Acute Gastrointestinal Graft Versus Host Disease                                                                          | 30<br>14-60 years old | FMT via endoscopy or colonoscopy up to 5 times               | <ul style="list-style-type: none"> <li>Response rate</li> </ul>                                                                                                                                                                             | 12 weeks  |
|                           | NCT04285424 | Faecal Microbiota Transplantation for Treatment of Steroid Resistant Acute Graft Versus Host Disease of the Gut                                                                                              | 30<br>18-75 years old | FMT via endoscopy or colonoscopy                             | <ul style="list-style-type: none"> <li>Gut acute Graft-versus-Host Disease (aGvHD) response</li> </ul>                                                                                                                                      | 7 days    |
|                           | NCT04269850 | Pilot Study of Faecal Microbiota Transplantation in Combination with Ruxolitinib and Steroids for Severe Acute Intestinal Graft-versus-host-disease After Allogeneic Hematopoietic Stem Cell Transplantation | 20<br>All ages        | FMT via capsule (2 capsules/kg body weight)                  | <ul style="list-style-type: none"> <li>Overall survival</li> </ul>                                                                                                                                                                          | 1 year    |

|                       |             |                                                                                                                                                                                           |                        |                                                           |                                                                                                                                                                 |           |
|-----------------------|-------------|-------------------------------------------------------------------------------------------------------------------------------------------------------------------------------------------|------------------------|-----------------------------------------------------------|-----------------------------------------------------------------------------------------------------------------------------------------------------------------|-----------|
|                       | NCT03819803 | Faecal Microbiota Transplantation in Patients with Acute Gastrointestinal Graft-versus-host-disease After Allogeneic Stem Cell Transplantation                                            | 15<br>18-70 years old  | FMT via colonoscopy                                       | <ul style="list-style-type: none"> <li>GI-aGvHD remission</li> </ul>                                                                                            | 1 year    |
| HSCT                  | NCT03678493 | A Randomized Placebo-Controlled Clinical Trial of Faecal Microbiota Transplantation in Patients with Acute Myeloid Leukaemia and Allogeneic Hematopoietic Cell Transplantation Recipients | 120<br>18+ years old   | FMT vs. placebo via capsule                               | <ul style="list-style-type: none"> <li>Efficacy of FMT in AML patients and allo-HCT recipients - Incidence of infections</li> </ul>                             | 6 months  |
|                       | NCT03720392 | A Phase 2 Study of Faecal Microbiota Transplantation (FMT) in Recipients After Allogeneic Hematopoietic Cell Transplantation (HCT)                                                        | 48<br>18-80 years old  | FMT vs. placebo via capsule                               | <ul style="list-style-type: none"> <li>The proportion of patients who achieve gut microbiome diversity at one month following the final post-HCT FMT</li> </ul> | 12 months |
| Cirrhosis             | NCT03796598 | Faecal Microbiota Transplant in Veterans with Cirrhosis                                                                                                                                   | 100<br>21-75 years old | FMT vs. placebo via enema and FMT vs. placebo via capsule | <ul style="list-style-type: none"> <li>Serious adverse events related to FMT</li> </ul>                                                                         | 6 months  |
|                       | NCT02862249 | A Prospective, Randomised Placebo Controlled Feasibility Trial of Faecal Microbiota Transplantation in Cirrhosis                                                                          | 32<br>18-75 years old  | 50g FMT vs. placebo via endoscopy                         | <ul style="list-style-type: none"> <li>Assessment of the feasibility of FMT</li> </ul>                                                                          | 18 months |
|                       | NCT03420482 | Faecal Microbiota Transplant as Treatment of Hepatic Encephalopathy                                                                                                                       | 30<br>18-75 years old  | 15 capsules of FMT vs. placebo on days 1, 2, 7, 14, 21    | <ul style="list-style-type: none"> <li>Psychometric Hepatic Encephalopathy Score (PHES)</li> </ul>                                                              | 4 weeks   |
|                       | NCT03439982 | A Prospective Single Centre Open-Label Trial of RBX2660 (Microbiota Suspension) in the Management of Hepatic Encephalopathy                                                               | 30<br>18+ years old    | FMT via colonoscopy (week 0) then weekly by enema (1-4)   | <ul style="list-style-type: none"> <li>Time to HE breakthrough</li> </ul>                                                                                       | 9 weeks   |
| Alcoholic hepatitis   | NCT03091010 | A Comparison of Faecal Microbiota Transplantation and Steroid Therapy in Patients with Severe Alcoholic Hepatitis A Randomized Controlled Trial.                                          | 112<br>21-70 years old | FMT via nasojejunal tube vs. standard of care             | <ul style="list-style-type: none"> <li>Proportion of participants with Overall Survival at 3 months</li> </ul>                                                  | 6 months  |
|                       | NCT03827772 | Faecal Microbiota Transplantation in Severe Alcoholic Hepatitis- Assessment of Impact on Prognosis and Short-term Outcome                                                                 | 40<br>18-60 years old  | 30g FMT via nasojejunal tube vs. control                  | <ul style="list-style-type: none"> <li>Survival</li> </ul>                                                                                                      | 3 months  |
| Hepatitis B infection | NCT04431375 | Efficacy of Addition of Faecal Microbiota Transplant (FMT) and Plasma Exchange to Tenofovir in Comparison to Monotherapy with Tenofovir in ACLF-HBV                                       | 70<br>18-75 years old  | FMT (and plasma exchange) vs. control                     | <ul style="list-style-type: none"> <li>Overall survival in both groups</li> </ul>                                                                               | 3 months  |

|                            |             |                                                                                                                                                                |                        |                                                                                   |                                                                                                                                                                                                                |           |
|----------------------------|-------------|----------------------------------------------------------------------------------------------------------------------------------------------------------------|------------------------|-----------------------------------------------------------------------------------|----------------------------------------------------------------------------------------------------------------------------------------------------------------------------------------------------------------|-----------|
|                            | NCT03429439 | A Randomised Study on Intestinal Microbiota Transplantation for Chronic Hepatitis B Combined with Antiviral Therapy                                            | 60<br>18-65 years old  | FMT via endoscopy every 2 weeks for 6 doses                                       | <ul style="list-style-type: none"> <li>Change of serum hepatitis B virus e antigen (HBeAg) level</li> </ul>                                                                                                    | 6 months  |
| Irritable bowel syndrome   | NCT04236843 | Faecal Microbiota Transplantation (FMT) in Patients with Irritable Bowel Syndrome (IBS): Optimizing the Treatment and Its Mechanism(s) of Action               | 150<br>18-75 years old | 90g FMT delivered once or twice into small intestine or once into large intestine | <ul style="list-style-type: none"> <li>Change in IBS-SSS total score</li> </ul>                                                                                                                                | 3 months  |
|                            | NCT03613545 | Efficacy and Safety of Faecal Microbiota Transplantation for Irritable Bowel Syndrome                                                                          | 120<br>18-75 years old | FMT vs. placebo via colonoscopy                                                   | <ul style="list-style-type: none"> <li>Change in Irritable Bowel Syndrome assessed by Symptom Severity Score (IBS-SSS)</li> </ul>                                                                              | 6 months  |
|                            | NCT03074227 | The FAIS-Trial: Faecal Transplantation in Adolescents with Refractory Irritable Bowel Syndrome                                                                 | 30<br>16-21 years old  | Allogeneic vs. autologous FMT via endoscopy                                       | <ul style="list-style-type: none"> <li>The proportion of patients with &gt; 50% reduction of their abdominal pain intensity and pain frequency at t=12 weeks after the first faecal transplantation</li> </ul> | 12 months |
|                            | NCT02651740 | Efficacy and Safety Evaluation of Rifaximin Combined Faecal Microbiota Transplantation in the Treatment of Irritable Bowel Syndrome with Predominant Diarrhoea | 10<br>18-65 years old  | FMT via enteral tube at least once                                                | <ul style="list-style-type: none"> <li>Number of patients with relief of IBS condition</li> </ul>                                                                                                              | 6 months  |
| Autistic spectrum disorder | NCT03408886 | Microbiota Transfer Therapy for Adults with Autism Spectrum Disorder (ASD) Who Have Gastrointestinal Disorders                                                 | 84<br>18-60 years old  | FMT vs. placebo via capsules                                                      | <ul style="list-style-type: none"> <li>Change in Childhood Autism Rating Scale (CARS) from baseline to 10 weeks</li> </ul>                                                                                     | 18 months |
|                            | NCT04182633 | Microbiota Transfer Therapy for Children with Autism Spectrum Disorder (ASD) Who Have Gastrointestinal Disorders                                               | 70<br>5-17 years old   | FMT vs. placebo via capsule for 12 weeks                                          | <ul style="list-style-type: none"> <li>Childhood Autism Rating Scale (CARS)</li> <li>Gastrointestinal Symptom Severity Scale (GSRS)</li> </ul>                                                                 | 18 months |
|                            | NCT04142255 | A Clinical Study to Explore the Efficacy of Faecal Microbiota Transplantation (FMT) in the Treatment of Childhood ASD Patients with Gastrointestinal Symptoms  | 20<br>3-17 years old   | Age based dosing of FMT daily for 3 days then weekly for 3 weeks                  | <ul style="list-style-type: none"> <li>Gastrointestinal Symptom Rating Scale (GSRS)</li> <li>Childhood Autism Rating Scale (CARS)</li> </ul>                                                                   | 24 weeks  |
|                            | NCT03426826 | Dynamics of Gut Microbiomes in Autism Spectrum Disorder (ASD) Symptoms                                                                                         | 10<br>5-17 years       | FMT vs. placebo via endoscopy                                                     | <ul style="list-style-type: none"> <li>Primary Outcome Measures, safety and tolerability</li> </ul>                                                                                                            | 24 weeks  |
| Chronic fatigue syndrome   | NCT03691987 | Faecal Microbiota Transplantation in Chronic Fatigue Syndrome - an RCT                                                                                         | 80<br>18-65 years old  | 50-80g Allogeneic vs. autologous FMT via enema                                    | <ul style="list-style-type: none"> <li>Change in individual global Fatigue Severity Scale score.</li> </ul>                                                                                                    | 12 months |

|                       |             |                                                                                                                                                                                                    |                       |                                                   |                                                                                                                                                                                                                                                                                                                                                                                             |          |
|-----------------------|-------------|----------------------------------------------------------------------------------------------------------------------------------------------------------------------------------------------------|-----------------------|---------------------------------------------------|---------------------------------------------------------------------------------------------------------------------------------------------------------------------------------------------------------------------------------------------------------------------------------------------------------------------------------------------------------------------------------------------|----------|
|                       | NCT04158427 | Intestinal Microbiota and Chronic Fatigue Syndrome. Effect of Faecal Transplant on Health-Related Quality of Life of the Patients with Chronic Fatigue Syndrome                                    | 40<br>18-65 years old | Allogeneic vs. autologous FMT via colonoscopy     | <ul style="list-style-type: none"> <li>• Health related quality of life assessed by EQ-5D-5L questionnaire</li> <li>• Health related quality of life assessed by 15D questionnaire</li> <li>• Health related quality of life assessed by Modified Fatigue Impact Scale</li> <li>• Ability to work or study</li> <li>• Visual Analog Fatigue Scale</li> </ul>                                | 1 month  |
| Pitt Hopkins syndrome | NCT04132427 | Microbiota Transfer Therapy for Children with Both Pitt Hopkins Syndrome and Gastrointestinal Disorders                                                                                            | 10<br>7-17 years old  | FMT vs. placebo via capsules                      | <ul style="list-style-type: none"> <li>• Daily stool record</li> <li>• Safety measures</li> </ul>                                                                                                                                                                                                                                                                                           | 14 weeks |
| Bipolar disorder      | NCT03279224 | A Randomized Controlled Trial of the Safety and Efficacy of Faecal Microbiota Transplantation in a Population with Bipolar Disorder                                                                | 60<br>18-65 years old | 50g allogeneic vs. autologous FMT via colonoscopy | <ul style="list-style-type: none"> <li>• Change in the MADRS total score from baseline (pre-intervention) to the final visit (week 24)</li> </ul>                                                                                                                                                                                                                                           | 24 weeks |
| Anorexia nervosa      | NCT03928808 | Safety and Efficacy of Faecal Microbiota Transplantation (FMT) in the Treatment of Severe and Enduring Anorexia Nervosa (SE-AN)                                                                    | 10<br>18-45 years     | FMT via nasogastric tube weekly for 4 weeks       | <ul style="list-style-type: none"> <li>• Proportion of Participants with Adverse Events (AEs)</li> <li>• Proportion of Participants with a Severe Adverse Event (SAE)</li> <li>• Number of Participants Recruited</li> <li>• Number of Participants Able to Complete 4 FMT Administrations</li> <li>• Number of Participants Reporting Acceptable Levels of GI distress Post FMT</li> </ul> | 3 years  |
| Multiple sclerosis    | NCT03594487 | Faecal Microbiota Transplantation (FMT) of FMP30 in Relapsing-Remitting Multiple Sclerosis: A Phase 1b Clinical Trial to Evaluate Feasibility, Safety, Tolerability and Effects on Immune Function | 30<br>18-60 years     | Up to 37.5g FMT via colonoscopy                   | <ul style="list-style-type: none"> <li>• Subjects who complete the study protocol</li> <li>• Change in faecal microbiota</li> <li>• Incidence of Treatment-Emergent Adverse Events [Safety and Tolerability]</li> </ul>                                                                                                                                                                     | 1 year   |
|                       | NCT04203017 | Allogeneic Faecal Microbiota Transplantation as a Consolidation Treatment After Autologous Hematopoietic Stem Cell Transplantation in Patients with Multiple Sclerosis                             | 20<br>18-55 years old | FMT via capsule                                   | <ul style="list-style-type: none"> <li>• To evaluate effectiveness of auto-HSCT in combination with FMT in patients with refractory multiple sclerosis</li> </ul>                                                                                                                                                                                                                           | 1 year   |
|                       | NCT03975413 | Single-Arm, Non-Randomized, Time Series, Single-Subject Study: Faecal Microbiota Transplantation (FMT) in Multiple Sclerosis                                                                       | 1                     | Not specified                                     | <ul style="list-style-type: none"> <li>• Faecal microbial community structure and functional changes over six timeframes for phylum, genus and species taxonomic level bacteria, virus, fungi, and archaea</li> <li>• Walking and balance changes over four timeframes for stride time (seconds)</li> </ul>                                                                                 | 1 year   |

|                               |             |                                                                                                                                                                                              |                       |                                                        |                                                                                                                                                                                                                                                                                                                                                                                                                                                     |          |
|-------------------------------|-------------|----------------------------------------------------------------------------------------------------------------------------------------------------------------------------------------------|-----------------------|--------------------------------------------------------|-----------------------------------------------------------------------------------------------------------------------------------------------------------------------------------------------------------------------------------------------------------------------------------------------------------------------------------------------------------------------------------------------------------------------------------------------------|----------|
|                               |             |                                                                                                                                                                                              |                       |                                                        | <ul style="list-style-type: none"> <li>Walking and balance changes over four timeframes for stride distance</li> <li>Walking and balance changes over four timeframes for cadence</li> <li>Walking and balance changes over four timeframes for step width</li> <li>Walking and balance changes over four timeframes for average pelvis forward velocity</li> <li>Walking and balance changes over four timeframes for pelvis smoothness</li> </ul> |          |
| Parkinson's disease           | NCT03808389 | A Double-blind, Placebo-controlled, Randomized Clinical Trial Investigating Faecal Microbiota Transplantation for Parkinson's Disease and Its Effect on Symptoms and Disease Progression     | 40<br>5-65 years old  | Allogeneic vs. autologous FMT via nasojejunal tube     | <ul style="list-style-type: none"> <li>Changes in clinical symptoms as scored on the MDS-UPDRS (Movement Disorder Society - Unified Parkinson's Disease Rating Scale)</li> </ul>                                                                                                                                                                                                                                                                    | 1 year   |
| Amyotrophic lateral sclerosis | NCT03766321 | Interplay Between Gut Microbiota and Adaptive Immunity in Amyotrophic Lateral Sclerosis: a Clinical Trial                                                                                    | 42<br>18-70 years old | FMT via nasojejunal tube vs. placebo at 0 and 6 months | <ul style="list-style-type: none"> <li>Change in <math>T_{regs}</math> number</li> </ul>                                                                                                                                                                                                                                                                                                                                                            | 1 year   |
| Epilepsy                      | NCT02889627 | Efficacy and Safety of Faecal Microbiota Transplantation for Epilepsy                                                                                                                        | 30<br>3-70 years old  | FMT via endoscopy or colonoscopy                       | <ul style="list-style-type: none"> <li>Frequency of the seizures</li> </ul>                                                                                                                                                                                                                                                                                                                                                                         | 3 months |
| Melanoma                      | NCT03353402 | Altering the Gut Microbiota of Melanoma Patients Who Failed Immunotherapy Using Faecal Microbiota Transplantation (FMT) From Responding Patients                                             | 40<br>18+ years       | FMT via colonoscopy then capsules                      | <ul style="list-style-type: none"> <li>Incidence of FMT-related Adverse Events</li> <li>Proper implant engraftment</li> </ul>                                                                                                                                                                                                                                                                                                                       | 4 years  |
|                               | NCT03341143 | Phase II Feasibility Study of Faecal Microbiota Transplant (FMT) in Advanced Melanoma Patients Not Responding to PD-1 Blockade                                                               | 20<br>18+ years old   | FMT via colonoscopy                                    | <ul style="list-style-type: none"> <li>Objective Response Rate (ORR)</li> </ul>                                                                                                                                                                                                                                                                                                                                                                     | 4 years  |
| Prostate cancer               | NCT04116775 | A Phase II Single Arm Study of Faecal Microbiota Transplant (FMT) in Men with Metastatic Castration Resistant Prostate Cancer Whose Cancer Has Not Responded to Enzalutamide + Pembrolizumab | 32<br>18+ years old   | FMT every 3 weeks for 5 cycles                         | <ul style="list-style-type: none"> <li>Anticancer effect of faecal microbiota transplant from responders to pembrolizumab to non-responders</li> </ul>                                                                                                                                                                                                                                                                                              | 2 years  |
| Renal cancer                  | NCT04163289 | Preventing Immune-Related Adverse Events in Renal Cell Carcinoma Patients Treated with Combination Immunotherapy Using Faecal Microbiota Transplantation                                     | 20<br>18+ years old   | FMT via capsule at 3 time points                       | <ul style="list-style-type: none"> <li>Occurrence of immune-related colitis associated with ipilimumab/nivolumab treatment</li> </ul>                                                                                                                                                                                                                                                                                                               | 9 years  |

|                          |             |                                                                                                                                                                                                                                    |                       |                                                                  |                                                                                                                                                                                                 |          |
|--------------------------|-------------|------------------------------------------------------------------------------------------------------------------------------------------------------------------------------------------------------------------------------------|-----------------------|------------------------------------------------------------------|-------------------------------------------------------------------------------------------------------------------------------------------------------------------------------------------------|----------|
| Gastrointestinal cancers | NCT04130763 | Investigator-initiated Trial of Faecal Microbiota Transplant (FMT) Capsule for Improving the Efficacy of Anti-PD-1 in Patients With PD-1 Resistant Digestive System Cancers                                                        | 10<br>18-70 years old | FMT via capsule for 3 days then weekly for 6 weeks               | <ul style="list-style-type: none"> <li>Objective Response Rate (ORR)</li> <li>Rate of abnormal vital signs and laboratory test results</li> <li>The number of adverse events</li> </ul>         | 14 weeks |
| Gut dysbiosis            | NCT04173208 | Main Trial of the Caesarean Section and Intestinal Flora of the Newborn Study                                                                                                                                                      | 100<br>18+ years old  | FMT vs. placebo via oral route                                   | <ul style="list-style-type: none"> <li>Longitudinal change of intestinal microbiota assessed with 16S rRNA and shotgun sequencing</li> </ul>                                                    | 2 years  |
| Allergy                  | NCT02960074 | A Phase I Open Label Trial to Evaluate the Safety and Efficacy of Oral Encapsulated Faecal Microbiota Transplantation in Peanut Allergic Patients                                                                                  | 15<br>18-40 years old | FMT via capsule over 2 days (1/3 to receive antibiotics prior)   | <ul style="list-style-type: none"> <li>Presence of FMT-related adverse events grade 2 or above</li> </ul>                                                                                       | 1 year   |
| Malnutrition             | NCT03087097 | Transfer of Healthy Gut Flora for Restoration of Intestinal Microbiota Via Enema (THRIVE) for Patients in the Rehabilitative Phase of Malnutrition: A Pilot Study Evaluating Microbial Engraftment, Safety and Nutritional Outcome | 20<br>1-5 years old   | FMT via enema (weight-based dosing)                              | <ul style="list-style-type: none"> <li>Serious Adverse Events</li> </ul>                                                                                                                        | 8 weeks  |
| Psoriatic arthritis      | NCT03058900 | Efficacy and Safety of Faecal Microbiota Transplantation (FMT) in Patients with Peripheral Psoriatic Arthritis: a 6-month, Double-Blind, Randomized, Placebo-Controlled Trial                                                      | 31<br>18-75 years old | 50g FMT vs. placebo via endoscopy                                | <ul style="list-style-type: none"> <li>Treatment failure</li> </ul>                                                                                                                             | 6 months |
| Rheumatoid arthritis     | NCT03944096 | Efficacy and Safety of Faecal Microbiota Transplantation in Patients with Rheumatoid Arthritis Refractory to Methotrexate: a 24-week, Double-Blind, Randomised Trial                                                               | 30<br>18-65 years old | 50g allogeneic vs. autologous FMT at 0 and 4 weeks via endoscopy | <ul style="list-style-type: none"> <li>The American College of Rheumatology 20 (ACR20) response at 16 weeks</li> </ul>                                                                          | 24 weeks |
| Ankylosing spondylitis   | NCT03726645 | The Role of Gut Microbiota in the Pathogenesis of Ankylosing Spondylitis (AS), and the Effect of Faecal Microbiota Transplantation on Gut Microbiota, Gut Wall Inflammation and Clinical Activity of AS                            | 20<br>18-75 years old | Allogeneic vs. autologous FMT via colonoscopy                    | <ul style="list-style-type: none"> <li>The effect of FMT (Faecal Microbiota Transplantation) on the clinical activity of ankylosing spondylitis (AS) as assessed by change in BASDAI</li> </ul> | 1 year   |
| IgA nephropathy          | NCT03633864 | Faecal Microbiota Transplantation for Refractory IgA Nephropathy: a Prospective, Single-centre, Cohort Study                                                                                                                       | 30<br>18-65 years old | FMT via endoscopy or enema                                       | <ul style="list-style-type: none"> <li>Change of Urinary protein</li> </ul>                                                                                                                     | 8 weeks  |
| Multiple                 | NCT04014413 | Safety and Efficacy of Faecal Microbiota Transplantation: A Pilot Study                                                                                                                                                            | 450<br>All ages       | Not specified                                                    | <ul style="list-style-type: none"> <li>The efficacy of FMT in treating dysbiosis-associated disorder will be assessed by number of patients who have improvement in clinical</li> </ul>         | 1 year   |

|  |             |                                                                                                                                                                                              |                     |                     |                                                                                                                                                         |          |
|--|-------------|----------------------------------------------------------------------------------------------------------------------------------------------------------------------------------------------|---------------------|---------------------|---------------------------------------------------------------------------------------------------------------------------------------------------------|----------|
|  |             |                                                                                                                                                                                              |                     |                     | symptoms (depends on each disease as stated in outcome)                                                                                                 |          |
|  | NCT03834051 | Prospective, Open-label Trial to Evaluate Efficacy of Faecal Microbiota Transplantation for Treatment of Chronic Gastrointestinal Dysbiosis or Clearance of Antimicrobial Resistant Organism | 50<br>18+ years old | FMT via enema       | <ul style="list-style-type: none"> <li>Symptom improvement in formal diagnosis of dysbiosis or clearance of antimicrobial resistant organism</li> </ul> | 2 years  |
|  | NCT03268213 | Faecal Microbial Transplantation in Patients with Medication Refractory Clostridium Difficile and/or Ulcerative Colitis or Indeterminate Colitis                                             | 12<br>7+ years old  | FMT via colonoscopy | <ul style="list-style-type: none"> <li>Number of participants with treatment-related adverse events as assessed by CTCAE v4.0</li> </ul>                | 10 years |
